# Supplementary material for: Structure and functional analysis of a bacterial adhesin sugar-binding domain
Source: PubMed Central journal article supplement (PMC6650083; doi:10.1371/journal.pone.0220045), 2019-07-23
Supplement: pone.0220045.s001.pdf [file pone.0220045.s001.pdf]

>MhPA14

MASSHHHHHSSGLVPRGSHMAPDAQADSFGGVAVQGLFGEYYAYAQGSDDGGNLSNVAQVKAFIAANEAD  
ATFIGRNIDYGSVSGDLGGNGKVQSFLKDDAGSLSTDPENSSDAIVKLTGNLELQAGTYQFRVRADDGYR  
IEVNGQTVAEYNGNQGANTRTGSEFTLTGDGPHSVEIVYWDQGGAAQLRIELREQGGAYEIFGSQHASHG  
SENP

>GFP\_MhPA14

MASSHHHHHSSGLVPRGSHMVSKGEELFTGVVPILEVELDGDVNGHKFSVSGEGEDATYGKLTCLKFICT  
TGKLPVPWPTLVTTLTYGVCFSRYPDHMKQHDFFKSAMPEGYVQERTIFFKDDGNYKTRAEVKFEGDTL  
VNRIELKGI DFKEDGNI LGHKLEYNYN SHNVYIMADKQKNGIKVNFKIRHNIEDGSVQLADHYQQNTPIG  
DGPVLLPDNHYLSTQSALSKDPNEKRDHMLLEFVTAAGITLGMDELYK GAGHMAPDAQADSFGGVAVQG  
LFGEYYAYAQGSDDGGNLSNVAQVKAFIAANEADATFIGRNIDYGSVSGDLGGNGKVQSFLKDDAGSLST  
PENSSDAIVKLTGNLELQAGTYQFRVRADDGYRIEVNGQTVAEYNGNQGANTRTGSEFTLTGDGPHSVEI  
VYWDQGGAAQLRIELREQGGAYEIFGSQHASHGSENP
