# Supplementary material for: Structure and functional analysis of a bacterial adhesin sugar-binding domain
Source: PubMed Central journal article supplement (PMC6650083; doi:10.1371/journal.pone.0220045), 2019-07-23
Supplement: pone.0220045.s003.pdf [file pone.0220045.s003.pdf]

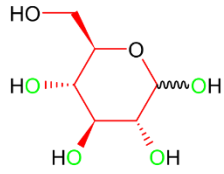

Glucose

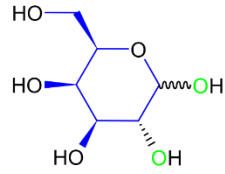

Galactose

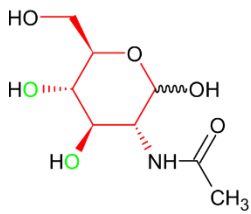

N-acetylglucosamine

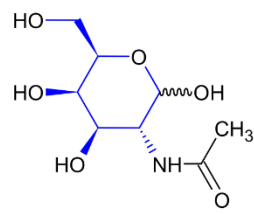

N-acetylgalactosamine

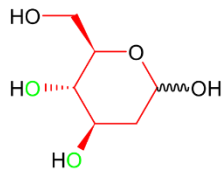

2-Deoxy-D-Glucose

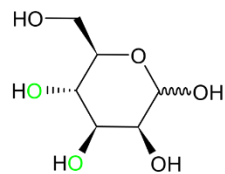

Mannose

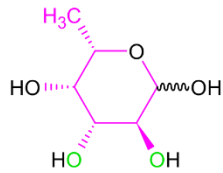

Fucose

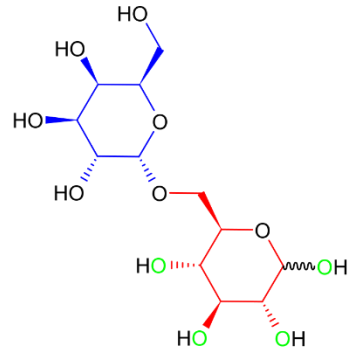

Melibiose

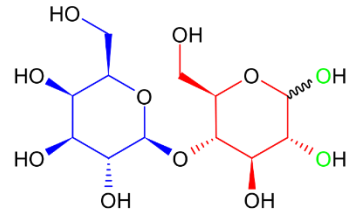

Lactose

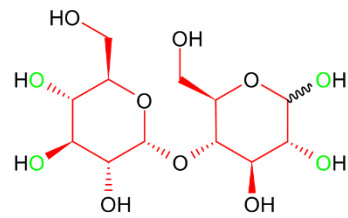

Maltose

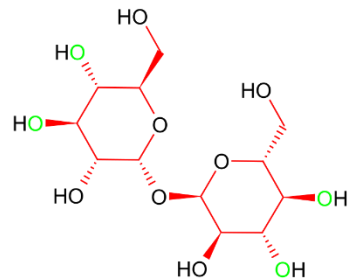

Trehalose

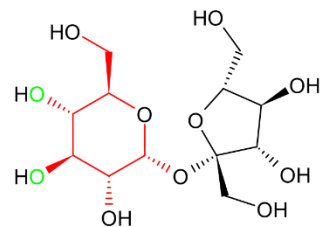

Sucrose
