# Supplementary material for: Structure and functional analysis of a bacterial adhesin sugar-binding domain
Source: PubMed Central journal article supplement (PMC6650083; doi:10.1371/journal.pone.0220045), 2019-07-23

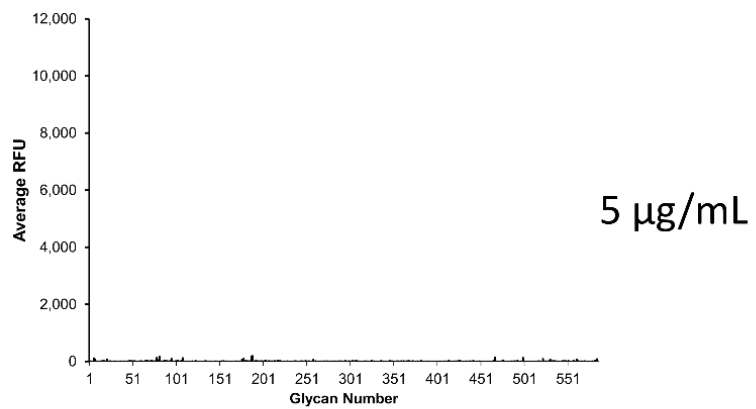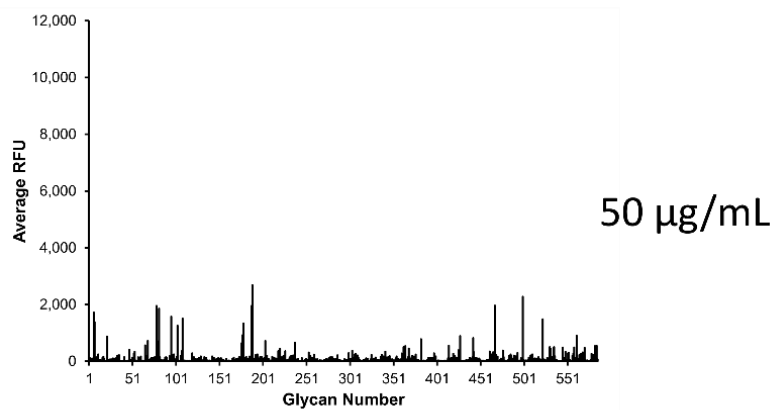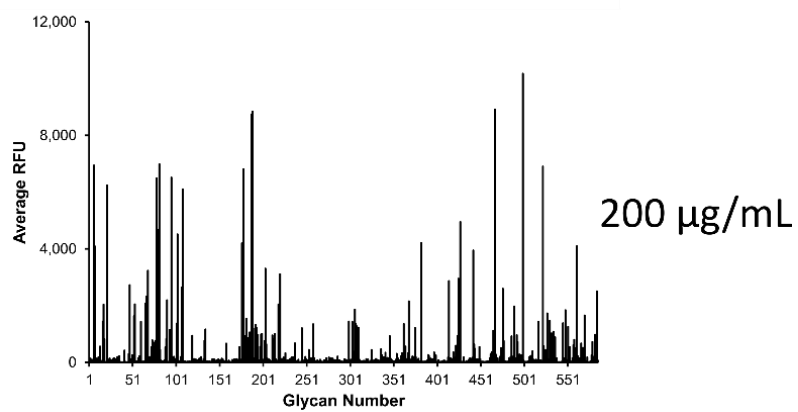

Supplement: pone.0220045.s004.pdf [file pone.0220045.s004.pdf]
